# Supplementary material for: Construction of a fur null mutant and RNA-sequencing provide deeper global understanding of the Aliivibrio salmonicida Fur regulon
Source: PubMed Central journal article supplement (PMC5511505; doi:10.7717/peerj.3461), 2017-07-13

$H_2O_2$ 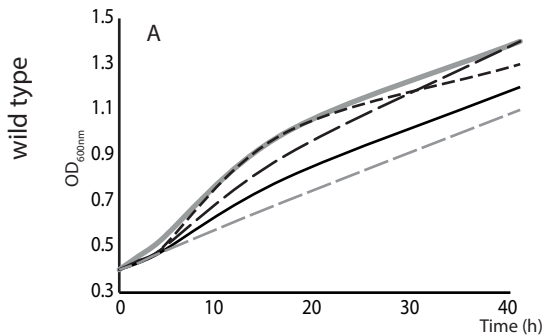

2,2'-dipyridyl

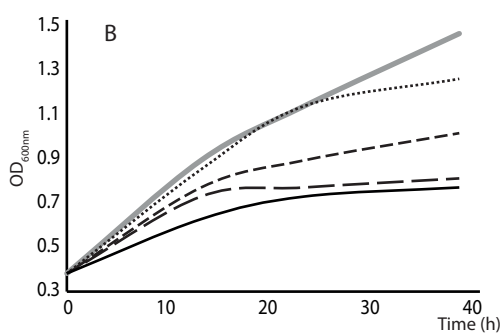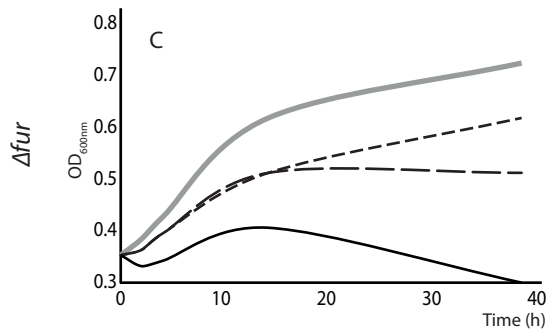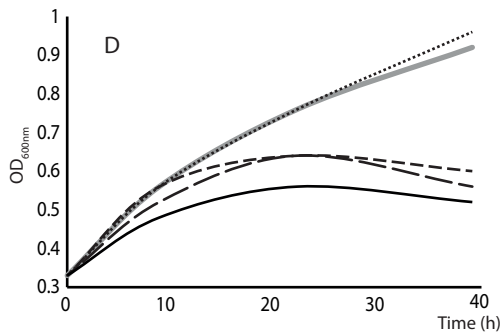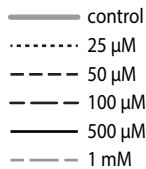

Supplement: peerj-05-3461-s003.pdf [file peerj-05-3461-s003.pdf]
